# Supplementary material for: Impacts of Tillage Practices on Growth, Phosphorus Uptake, and Yield of Maize in Controlled and Field-Based Studies in Relation to Arbuscular Mycorrhizal Fungi
Source: MDPI journal article supplement (doi:10.3390/applmicrobiol3020025), 2023-04-22
Supplement: s1 [file s1]

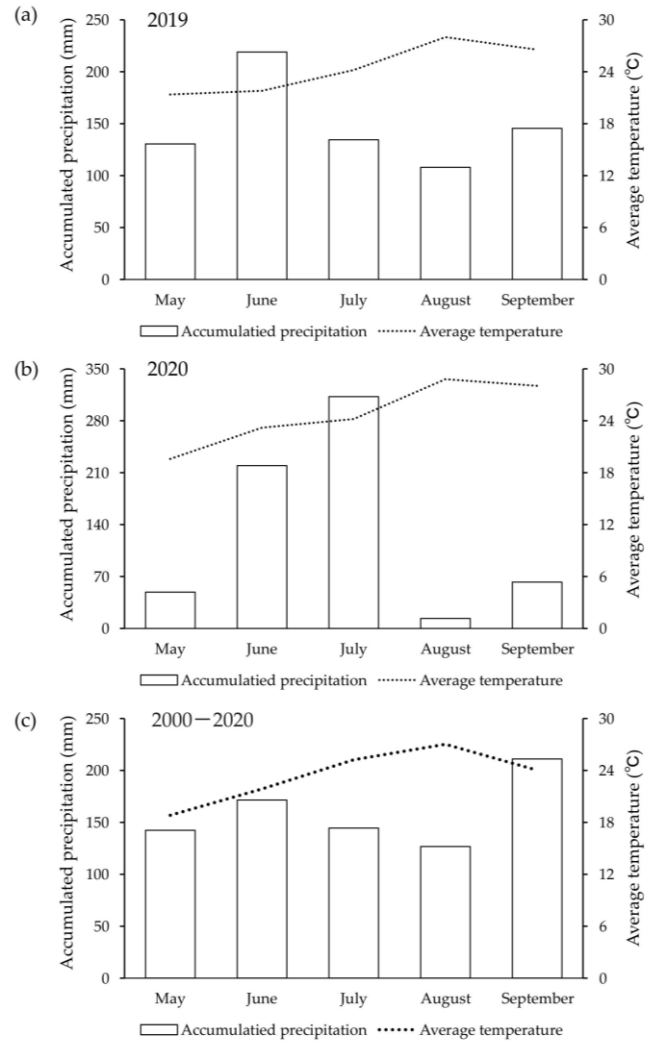

**Figure S1.** Accumulated precipitation and average temperature during the growing season. **(a)** From May 20 to September 16 in 2019. **(b)** From May 14 to September 9 in 2020. **(c)** Average temperature and accumulated precipitation from May to September for the years 2000 and 2020.

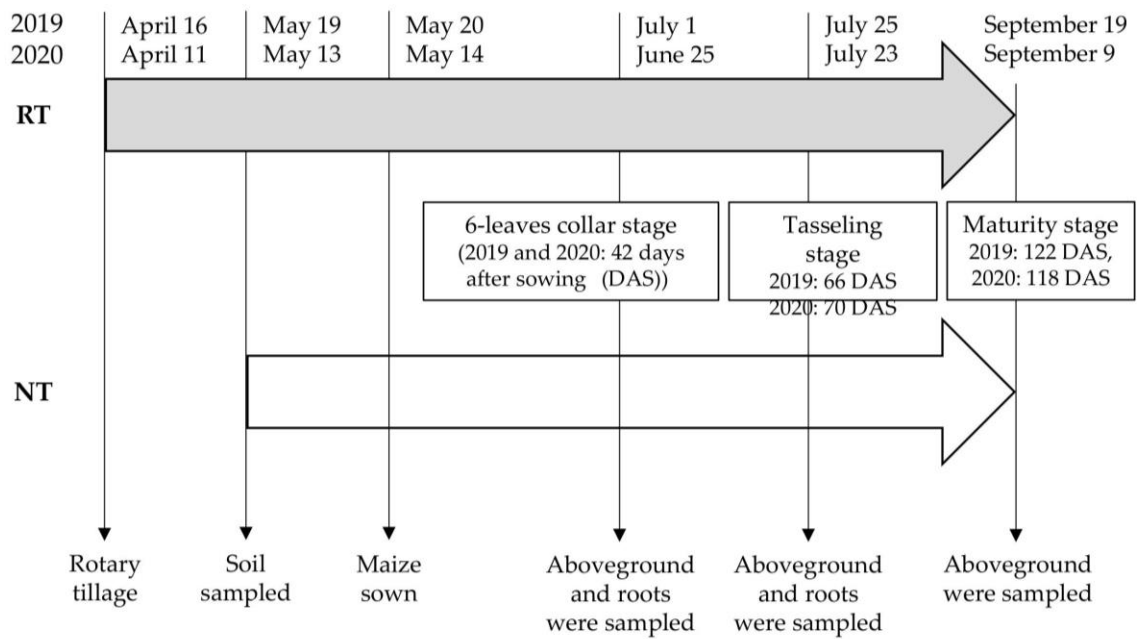

**Figure S2.** Cultivation system in experiment 1. RT=Rotary tillage, NT=No-tillage.

**Table S1.** Soil chemical properties in the field experiment.

| Soil chemical properties    | Values      |
|-----------------------------|-------------|
| Soil pH (H <sub>2</sub> O)  | 5.91 ± 0.01 |
| EC (μS/cm)                  | 63.8 ± 3.74 |
| Available soil P (mg/100 g) | 3.83 ± 0.72 |
| Nitrate N (mg/100 g)        | 20.9 ± 2.42 |
| Exchangeable (mg/100 g)     | 52.0 ± 2.89 |

**Table S2.** Soil chemical properties in the pot experiment.

| Soil chemical properties    | Values      |
|-----------------------------|-------------|
| Soil pH (H <sub>2</sub> O)  | 6.20 ± 0.03 |
| EC (μS/cm)                  | 5.00 ± 3.33 |
| Available soil P (mg/100 g) | 1.74 ± 0.40 |
| Nitrate N (mg/100 g)        | 1.66 ± 0.03 |
